# Supplementary material
Source: PubMed Central journal article supplement (PMC5946501)
Supplement: AnnalsATS.201706-426OC_metersky_data_supplement.pdf [file AnnalsATS.201706-426OC_metersky_data_supplement.pdf]

## **Online Data Supplement**

### **The Prevalence and Significance of *Staphylococcus aureus* in Patients with non-Cystic Fibrosis Bronchiectasis**

Mark L. Metersky, MD, Timothy R. Aksamit, MD, Alan Barker, MD, Radmila Choate, MPH, Charles L. Daley, MD, Leigh A. Daniels, MD, Angela DiMango, MD, Edward Eden, MD, David Griffith, MD, Margaret Johnson, MD, Michael Knowles, MD, Anne E. O'Donnell, MD, Kenneth Olivier, MD, Matthias Salathe, MD, Byron Thomashow, MD, Gregory Tino, MD, Gerard Turino, MD, Kevin L. Winthrop, MD, David Mannino, MD

**Supplemental Table 1.** Demographic and Baseline Characteristics for Participants with Growth of *Staphylococcus aureus* and Evaluation of Methicillin Resistance/Sensitivity at Baseline

|                                                             | <b>Methicillin Resistant <i>Staphylococcus aureus</i> Growth at Baseline (N = 22)</b> | <b>Methicillin Sensitive <i>Staphylococcus aureus</i> Growth at Baseline (N = 45)</b> | <b>P-value</b> |
|-------------------------------------------------------------|---------------------------------------------------------------------------------------|---------------------------------------------------------------------------------------|----------------|
| <b>Gender, n (%)</b>                                        | N = 22                                                                                | N = 44                                                                                | 0.5182         |
| Female                                                      | 19 (86)                                                                               | 34 (77)                                                                               |                |
| <b>Age (years)</b>                                          | N = 22                                                                                | N = 44                                                                                | 0.6730         |
| Mean (SD)                                                   | 62 (15)                                                                               | 64 (12)                                                                               |                |
| <b>Age at Diagnosis (years)</b>                             | N = 20                                                                                | N = 42                                                                                | 0.7574         |
| Mean (SD)                                                   | 53 (17)                                                                               | 54 (16)                                                                               |                |
| <b>Tobacco Use, n (%)</b>                                   | N = 22                                                                                | N = 44                                                                                | 0.5851         |
| Past or Present                                             | 9 (41)                                                                                | 14 (32)                                                                               |                |
| Never                                                       | 13 (59)                                                                               | 30 (68)                                                                               |                |
| <b>Pulmonary Exacerbations in the Past Two Years, n (%)</b> | N = 22                                                                                | N = 43                                                                                | 0.3492         |
| Yes                                                         | 19 (86)                                                                               | 32 (74)                                                                               |                |
| <b>Pre-bronchodilator FEV1 (liters) at Entry</b>            | N = 20                                                                                | N = 41                                                                                | 0.4067         |
| Mean (SD)                                                   | 1.63 (0.68)                                                                           | 1.81 (0.79)                                                                           |                |
| <b>Pre-bronchodilator FEV1 (% predicted) at Entry</b>       | N = 20                                                                                | N = 41                                                                                | 0.6174         |
| Mean (SD)                                                   | 65 (24)                                                                               | 68 (21)                                                                               |                |

**Supplemental Table 2.** Year 1 Follow-up Data on Pulmonary Function and Exacerbations for Participants with Growth for *Staphylococcus aureus* and Evaluation of Methicillin Resistance/Sensitivity at Baseline

|                                                                                       | <b>Methicillin<br/>Resistant<br/><i>Staphylococcus<br/>aureus</i> Growth at<br/>Baseline<br/>(N = 22)</b> | <b>Methicillin Sensitive<br/><i>Staphylococcus<br/>aureus</i> Growth at<br/>Baseline<br/>(N = 45)</b> | <b>P-value</b> |
|---------------------------------------------------------------------------------------|-----------------------------------------------------------------------------------------------------------|-------------------------------------------------------------------------------------------------------|----------------|
| <b># of Exacerbations Between Study Entry and First F/U Visit</b>                     | N = 21                                                                                                    | N = 40                                                                                                | 0.9412         |
| Mean (SD)                                                                             | 1.0 (1.1)                                                                                                 | 1.0 (1.1)                                                                                             |                |
| <b># of Hospitalizations Between Study Entry and First F/U Visit</b>                  | N = 21                                                                                                    | N = 40                                                                                                | 0.4788         |
| Mean (SD)                                                                             | 0.3 (0.7)                                                                                                 | 0.2 (0.4)                                                                                             |                |
| <b>Change in Pre-bronchodilator FEV1 (liters) from Study Entry to First F/U Visit</b> | N = 11                                                                                                    | N = 14                                                                                                | 0.1700         |
| Mean (SD)                                                                             | 0.13 (0.42)                                                                                               | -0.12 (0.31)                                                                                          |                |
